# Supplementary material for: ASAR lncRNAs control DNA replication timing through interactions with multiple hnRNP/RNA binding proteins
Source: bioRxiv preprint, doi:10.1101/2022.06.04.494840, version 4 (2024-03-22)
Supplement: Figure 1 source data 2 [file 494840_file17.xlsx]

## Sheet: Sheet1
Figure 1-table supplement 2
chrom	start	stop	gene	chrom	start	stop	K562.GPKOW.combined.coverage_log2_ratio	HepG2.FXR2.combined.coverage_log2_ratio	K562.EIF3G.combined.coverage_log2_ratio	HepG2.KHSRP.combined.coverage_log2_ratio	K562.WRN.combined.coverage_log2_ratio	HepG2.SUB1.combined.coverage_log2_ratio	HepG2.QKI.combined.coverage_log2_ratio	HepG2.ZC3H11A.combined.coverage_log2_ratio	HepG2.HNRNPK.combined.coverage_log2_ratio	K562.NOLC1.combined.coverage_log2_ratio	HepG2.TBRG4.combined.coverage_log2_ratio	K562.PUM1.combined.coverage_log2_ratio	HepG2.SMNDC1.combined.coverage_log2_ratio	K562.DDX24.combined.coverage_log2_ratio	K562.DDX6.combined.coverage_log2_ratio	K562.U2AF1.combined.coverage_log2_ratio	HepG2.HLTF.combined.coverage_log2_ratio	HepG2.EIF3H.combined.coverage_log2_ratio	HepG2.RBM22.combined.coverage_log2_ratio	HepG2.CSTF2T.combined.coverage_log2_ratio	K562.GTF2F1.combined.coverage_log2_ratio	K562.DDX55.combined.coverage_log2_ratio	K562.TIA1.combined.coverage_log2_ratio	HepG2.LIN28B.combined.coverage_log2_ratio	K562.SSB.combined.coverage_log2_ratio	K562.LARP4.combined.coverage_log2_ratio	K562.WDR43.combined.coverage_log2_ratio	K562.XRCC6.combined.coverage_log2_ratio	HepG2.FASTKD2.combined.coverage_log2_ratio	HepG2.LSM11.combined.coverage_log2_ratio	K562.CSTF2T.combined.coverage_log2_ratio	HepG2.GRWD1.combined.coverage_log2_ratio	K562.DGCR8.combined.coverage_log2_ratio	K562.HNRNPU.combined.coverage_log2_ratio	K562.RBM15.combined.coverage_log2_ratio	HepG2.SDAD1.combined.coverage_log2_ratio	K562.U2AF2.combined.coverage_log2_ratio	HepG2.UTP18.combined.coverage_log2_ratio	K562.FMR1.combined.coverage_log2_ratio	K562.FAM120A.combined.coverage_log2_ratio	HepG2.LARP7.combined.coverage_log2_ratio	K562.TBRG4.combined.coverage_log2_ratio	K562.SAFB2.combined.coverage_log2_ratio
chr1	187039986	187535493	asar1-187	chr1	187040000	187050000	1	0.80258	0.833648	0.605497	0.859397	0.632455	0.657368	0.83029	0.611839	0.728475	0.593851	0.513504	0.543974	1	1	0.0278755	0.704814	0.558415	0.654186	0.595568	0.881281	0.994987	0.850745	0.532647	1	1	1	0.838121	0.567246	0.560821	0.917775	0.520272	0.658246	0.780858	0.663427	0.853671	0.0335271	0.735949	0.988635	1	0.545326	0.821474	0.826438
chr1	187039986	187535493	asar1-187	chr1	187060000	187070000	0.991194	0.498774	0.60751	0.605497	1	1	0.657368	0.704707	0.611839	1	0.000401272	1	0.848766	1	0.798922	0.631138	0.704814	0.558415	0.654186	0.595568	0.884183	1	0.869007	0.532647	1	0.726364	0.992135	0.789259	0.869756	0.560821	0.998792	0.520272	1	0.0829674	1	0.853671	0.614239	0.548234	0.898217	1	0.545326	0.862747	0.774071
chr1	187039986	187535493	asar1-187	chr1	187090000	187100000	1	0.498774	0.0419504	0.605497	1	0.508999	0.657368	0.704707	0.611839	0.622728	0.593851	1	0.543974	1	1	0.631138	0.704814	0.558415	0.654186	0.595568	0.841673	0.936069	0.990256	0.532647	1	0.0970907	0.608803	0.981217	0.731754	0.560821	0.908264	0.520272	1	0.656351	1	0.833957	0.614239	0.548234	0.778125	1	0.545326	0.937891	0.002002
chr1	187039986	187535493	asar1-187	chr1	187110000	187120000	0.955447	0.498774	0.60751	0.605497	1	1	0.657368	0.704707	0.611839	0.257163	0.593851	1	0.543974	1	1	0.631138	0.704814	0.558415	0.654186	0.595568	0.655115	1	0.850745	0.532647	0.946206	0.726364	0.775359	0.915993	0.567246	0.560821	0.550082	0.520272	1	0.88481	0.91649	0.826206	0.0872009	0.548234	0.194917	1	0.545326	0.462185	0.696376
chr1	187039986	187535493	asar1-187	chr1	187160000	187170000	1	0.80258	0.611366	0.605497	0.995853	1	0.657368	0.704707	0.611839	0.921101	0.593851	1	0.543974	1	0.959501	0.631138	0.704814	0.558415	0.810471	0.595568	1	0.592479	0.850745	0.532647	1	0.847473	1	1	0.592003	0.560821	1	0.520272	0.922415	0.780858	1	0.917179	0.048571	0.548234	0.545173	0.8301	0.545326	0.641377	0.863265
chr1	187039986	187535493	asar1-187	chr1	187190000	187200000	0.814765	0.498774	0.611366	0.605497	0.789617	0.965918	0.657368	0.704707	0.611839	0.921101	0.593851	1	0.848766	1	1	0.631138	0.704814	0.558415	0.654186	0.595568	0.861714	0.615169	0.850745	0.532647	1	0.726364	0.871649	0.965928	0.567246	0.560821	0.758027	0.520272	0.990144	0.353465	0.9834	0.826206	0.614239	0.548234	0.438926	1	0.545326	0.893193	0.810509
chr1	187039986	187535493	asar1-187	chr1	187220000	187230000	0.975087	0.498774	0.172435	0.605497	1	1	0.657368	0.704707	0.611839	1	0.593851	1	0.543974	1	1	1	0.704814	0.558415	0.654186	0.595568	1	0.567766	0.850745	0.532647	1	0.893669	0.866418	0.78389	0.731754	0.560821	0.874915	0.520272	1	0.780858	1	0.853671	0.903101	0.548234	0.00270317	1	0.545326	0.828404	0.774071
chr1	187039986	187535493	asar1-187	chr1	187270000	187280000	0.873229	0.498774	1	0.605497	1	1	0.657368	0.704707	0.611839	0.73896	0.593851	0.770089	0.543974	1	1	0.37918	0.704814	0.558415	0.654186	0.595568	0.655115	0.567766	0.850745	0.532647	0.740986	1	0.866418	0.685349	0.567246	0.560821	0.884461	0.520272	1	0.780858	1	0.826206	0.614239	0.548234	0.907696	1	0.545326	0.804471	0.774071
chr1	187039986	187535493	asar1-187	chr1	187290000	187300000	0.995742	0.498774	0.819154	0.766734	0.908605	1	0.657368	0.856795	0.611839	0.973471	0.593851	1	0.543974	1	1	0.631138	0.704814	0.558415	0.654186	0.595568	0.998993	1	0.850745	0.532647	0.472989	0.726364	1	0.997825	0.567246	0.560821	0.875991	0.520272	0.86576	0.84652	0.889266	0.833957	0.614239	0.548234	0.679893	1	0.545326	0.827655	0.774071
chr1	187039986	187535493	asar1-187	chr1	187320000	187330000	0.751568	0.498774	0.172435	0.605497	0.966637	0.182855	0.657368	0.704707	0.611839	0.0591723	0.593851	1	0.543974	1	0.993473	0.997495	0.704814	0.558415	0.654186	0.595568	0.655115	0.873817	0.850745	0.532647	1	0.726364	0.281748	0.685349	0.567246	0.560821	0.0722611	0.520272	1	0.730976	1	0.853671	0.952806	0.548234	0.0119761	1	0.545326	0.987526	0.00646605
chr1	187039986	187535493	asar1-187	chr1	187370000	187380000	0.752717	0.498774	0.0460105	0.844836	0.771116	0.870501	0.657368	0.704707	0.611839	0.622728	0.780037	0.513504	0.543974	0.652779	0.961983	0.631138	0.704814	0.558415	0.810471	0.595568	0.830725	0.312778	0.850745	0.532647	0.940521	0.917975	0.991503	0.685349	0.567246	0.560821	0.944486	0.520272	1	0.780858	0.767411	0.826206	1	0.548234	0.755131	0.960862	0.545326	0.982101	0.774071
chr1	187039986	187535493	asar1-187	chr1	187050000	187060000	0.864345	0.498774	0.68532	0.605497	0.859397	1	0.657368	0.704707	0.611839	1	0.593851	1	0.543974	1	0.984171	0.631138	0.704814	0.558415	0.810471	0.595568	0.786972	1	0.399614	0.532647	1	0.986358	1	0.997293	0.731754	0.560821	0.681026	0.520272	0.987517	0.724627	1	0.826206	0.614239	0.548234	0.927989	1	0.545326	0.804471	0.774071
chr1	187039986	187535493	asar1-187	chr1	187080000	187090000	0.967806	0.498774	0.713869	0.605497	1	1	0.657368	0.704707	0.611839	0.662791	0.593851	1	0.543974	1	1	0.631138	0.704814	0.837858	0.654186	0.595568	0.799739	0.750507	0.869007	0.532647	1	0.726364	0.922483	1	0.869756	0.560821	0.875991	0.520272	0.861795	0.116343	1	0.833957	0.614239	0.548234	0.6193	1	0.545326	0.632957	0.132561
chr1	187039986	187535493	asar1-187	chr1	187100000	187110000	0.750628	0.498774	0.60751	0.605497	0.823215	0.508999	0.657368	0.704707	0.943509	6.18e-15	0.593851	1	0.543974	0.968939	1	0.977268	0.759823	0.558415	0.654186	0.595568	0.269671	0.567766	0.870531	0.532647	1	2.55e-09	0.00988287	0.685349	0.567246	0.560821	0.833725	0.626336	1	0.894813	0.663427	0.826206	0.848191	0.548234	1	1	0.545326	0.0544635	8.37e-07
chr1	187039986	187535493	asar1-187	chr1	187120000	187130000	0.750628	0.498774	0.00961745	0.605497	0.891751	1	0.657368	0.856795	0.611839	0.953789	0.593851	1	0.543974	1	1	0.631138	0.704814	0.558415	0.654186	0.706891	0.997073	1	0.850745	0.532647	0.634051	0.863378	0.944107	0.789259	0.731754	0.560821	0.916842	0.520272	1	0.780858	1	0.853671	0.957413	0.548234	1	1	0.545326	0.632957	0.833449
chr1	187039986	187535493	asar1-187	chr1	187130000	187140000	0.846697	0.498774	0.0118482	0.605497	0.859397	1	0.657368	0.723723	0.611839	0.962592	0.593851	1	0.543974	1	0.731338	0.137374	0.704814	0.558415	0.654186	0.595568	0.875614	0.567766	0.850745	1	1	0.81548	0.923165	1	0.567246	0.560821	1	0.520272	0.946997	0.575422	1	0.833957	0.247389	0.548234	0.545173	1	0.545326	0.632957	0.774071
chr1	187039986	187535493	asar1-187	chr1	187150000	187160000	0.750628	0.498774	0.60751	0.605497	0.837725	0.874637	0.657368	0.704707	0.611839	0.622728	0.593851	1	0.543974	1	0.969053	0.938403	0.704814	0.558415	0.654186	0.595568	0.8038	1	0.850745	0.532647	1	0.726364	0.830842	0.954421	0.567246	0.560821	1	0.520272	0.87465	0.780858	1	0.826206	0.614239	0.548234	0.937353	1	0.545326	0.632957	0.395933
chr1	187039986	187535493	asar1-187	chr1	187180000	187190000	0.977888	0.498774	0.796725	0.82219	0.990924	1	0.871811	0.704707	0.611839	0.915309	0.593851	1	0.543974	1	1	0.645997	0.704814	0.558415	0.654186	0.595568	0.875614	0.923621	0.58482	0.532647	1	0.986358	1	1	0.567246	0.560821	1	0.520272	1	0.849543	1	0.853671	0.977199	0.548234	0.907696	1	0.545326	0.792802	0.774071
chr1	187039986	187535493	asar1-187	chr1	187200000	187210000	0.773294	0.498774	0.981801	0.605497	1	1	0.657368	0.704707	0.611839	0.950125	0.593851	1	0.990153	1	1	0.997495	0.759823	0.558415	0.654186	0.595568	0.971548	1	0.850745	0.532647	1	0.99205	0.775359	0.971106	0.567246	0.560821	1	0.520272	0.976917	0.0327261	1	0.826206	0.721418	0.548234	1	1	0.545326	0.980908	0.0089605
chr1	187039986	187535493	asar1-187	chr1	187210000	187220000	0.752717	0.498774	1	0.605497	1	1	0.657368	0.704707	0.611839	1	0.593851	1	0.848766	1	1	0.631138	0.704814	0.558415	0.654186	0.595568	0.917297	0.923621	0.850745	0.532647	0.962345	0.726364	1	0.685349	0.567246	0.560821	1	0.520272	1	0.780858	1	0.833957	0.614239	0.548234	1	1	0.545326	0.632957	0.774071
chr1	187039986	187535493	asar1-187	chr1	187230000	187240000	0.981019	0.498774	0.60751	0.605497	0.898812	0.508999	0.657368	0.856795	0.611839	0.622728	0.593851	1	0.543974	0.998735	1	1	0.704814	0.558415	0.654186	0.595568	0.655115	1	0.850745	0.532647	1	0.726364	0.936724	1	0.567246	0.560821	0.863083	0.520272	0.922415	0.0605455	1	0.853671	0.614239	0.548234	0.545173	1	0.545326	0.632957	0.773526
chr1	187039986	187535493	asar1-187	chr1	187250000	187260000	0.750628	0.498774	0.60751	0.605497	1	0.508999	0.657368	0.83029	0.611839	1	0.593851	1	0.543974	1	1	1	0.759823	0.558415	0.654186	0.595568	0.947727	1	0.850745	0.532647	1	0.989254	0.99714	1	0.567246	0.560821	1	0.520272	0.922415	0.780858	0.999213	0.853671	0.90786	0.735949	0.545173	1	0.545326	0.820262	0.833449
chr1	187039986	187535493	asar1-187	chr1	187260000	187270000	0.837103	0.498774	0.935334	0.605497	0.828382	0.508999	0.657368	0.704707	0.611839	1	0.593851	1	0.543974	1	1	0.977268	0.704814	0.558415	0.654186	0.595568	0.655115	0.721041	0.850745	0.532647	1	0.726364	1	0.981621	0.567246	0.560821	1	0.520272	0.622001	0.780858	0.98533	0.853671	0.977199	0.548234	0.755131	1	0.545326	1	0.774071
chr1	187039986	187535493	asar1-187	chr1	187280000	187290000	1	0.498774	0.523776	0.605497	1	1	0.657368	0.704707	0.611839	1	0.593851	1	0.543974	1	0.986103	0.631138	0.704814	0.558415	0.654186	0.595568	1	1	0.850745	0.532647	1	0.726364	0.984909	0.789259	0.567246	0.560821	1	0.520272	1	0.930088	1	0.853671	0.614239	0.548234	0.864722	1	0.545326	0.632957	0.774071
chr1	187039986	187535493	asar1-187	chr1	187310000	187320000	1	0.498774	0.60751	0.605497	0.771116	1	0.657368	0.704707	0.611839	0.215656	0.593851	1	0.543974	0.607275	0.921157	0.631138	0.704814	0.558415	0.810471	0.595568	0.655115	0.700858	0.903242	0.532647	1	0.349174	1	1	0.567246	0.560821	1	0.520272	0.933477	0.780858	0.91309	0.853671	0.895486	0.548234	0.907696	1	0.545326	0.390779	0.468349
chr1	187039986	187535493	asar1-187	chr1	187330000	187340000	0.964844	0.498774	0.60751	0.605497	0.985965	1	0.657368	0.704707	0.611839	0.892411	0.593851	0.935483	0.543974	0.975422	1	0.37918	0.704814	0.558415	0.654186	0.595568	0.918933	0.141025	0.869007	0.532647	0.634051	0.847473	0.866418	1	0.567246	0.560821	1	0.520272	1	0.962148	0.905766	0.853671	0.614239	0.548234	0.545173	0.641248	0.545326	0.127401	0.833449
chr1	187039986	187535493	asar1-187	chr1	187360000	187370000	0.750628	0.498774	0.523776	0.605497	0.789617	0.870501	0.657368	0.704707	0.611839	0.622728	0.593851	0.842944	0.543974	0.662889	1	0.645997	0.704814	0.558415	0.654186	0.595568	1	0.567766	0.850745	0.532647	0.472989	0.726364	0.754401	0.789259	0.567246	0.560821	0.94988	0.520272	0.927869	0.88481	0.774409	0.833957	0.614239	0.548234	0.545173	0.897574	0.860184	0.409572	0.103363
chr1	187039986	187535493	asar1-187	chr1	187410000	187420000	0.893445	0.498774	1	0.678686	0.997335	1	0.657368	0.723723	0.611839	1	0.593851	1	0.848766	1	1	0.37918	0.896671	0.558415	0.654186	0.595568	1	0.944823	0.903201	0.532647	1	1	0.775359	1	0.567246	0.560821	1	0.913775	1	0.0150865	0.974861	0.945066	0.614239	0.735949	0.955789	0.960862	0.545326	0.847297	0.774071
chr1	187039986	187535493	asar1-187	chr1	187440000	187450000	0.750628	0.498774	0.60751	0.605497	0.859397	1	0.657368	0.704707	0.611839	0.382788	0.593851	0.945556	0.543974	0.8333	0.937328	0.0112279	0.759823	0.558415	0.654186	0.706891	0.996764	0.834978	0.850745	0.532647	1	0.726364	0.754401	0.993144	0.731754	0.560821	0.754486	0.728481	0.597154	0.780858	0.663427	0.833957	0.000670943	0.548234	0.072553	1	0.98453	0.710377	0.774071
chr1	187039986	187535493	asar1-187	chr1	187030000	187040000	1	0.498774	1	0.605497	0.859397	0.870501	0.657368	0.704707	0.611839	0.646677	0.593851	0.994271	0.848766	1	1	0.977268	0.704814	0.558415	0.654186	0.595568	0.976045	1	0.869007	0.532647	1	0.847473	0.866418	1	0.567246	0.560821	1	0.520272	1	0.636672	1	0.889025	0.991187	0.548234	1	1	0.545326	0.859394	0.548401
chr1	187039986	187535493	asar1-187	chr1	187300000	187310000	0.977888	0.80258	1	0.605497	0.799733	0.508999	0.657368	0.704707	0.611839	0.622728	0.593851	1	0.543974	0.975069	0.8982	0.882983	0.704814	0.558415	0.654186	0.595568	0.655115	0.854641	0.850745	0.532647	0.940521	0.726364	0.99849	0.685349	0.567246	0.560821	0.761535	0.520272	1	0.0760048	0.843649	0.833957	0.614239	0.548234	0.545173	1	0.545326	0.804471	0.00199933
chr1	187039986	187535493	asar1-187	chr1	187430000	187440000	0.750628	0.498774	0.60751	0.774428	0.789617	0.508999	0.657368	0.83029	0.611839	0.92259	0.593851	0.830785	0.543974	0.849622	1	0.631138	0.759823	0.558415	0.654186	0.595568	0.673883	0.834978	0.850745	0.532647	1	0.847473	0.775359	1	0.592003	0.560821	0.916842	0.612651	0.597154	0.305159	0.672028	0.826206	0.221423	0.735949	0.864722	1	0.545326	0.409572	0.774071
chr6	140944044	141227043	asar6-141	chr6	140940000	140950000	0.941166	0.990218	0.60751	1	0.962163	1	0.846317	0.955789	1	0.919528	1	1	0.882033	1	1	0.102352	9.82e-05	0.558415	0.0452074	0.706891	0.831637	0.781658	0.286152	0.614774	0.822303	0.948899	1	0.961609	0.863882	0.79013	1	0.811157	0.922415	0.780858	1	0.826206	0.614239	1	0.888305	1	0.98453	0.66643	0.859879
chr6	140944044	141227043	asar6-141	chr6	140950000	140960000	0.981446	0.881949	1	0.82219	1	1	7.24e-05	0.165025	1	0.969992	0.593851	1	0.543974	1	1	0.631138	0.305195	0.668361	0.654186	1	1	0.567766	0.850745	0.532647	1	0.980026	0.974023	1	1	1	1	0.910716	1	0.899833	1	0.826206	0.349655	0.569687	1	1	0.785534	0.632957	0.833449
chr6	140944044	141227043	asar6-141	chr6	140960000	140970000	0.752717	1	0.0814473	0.605497	0.789617	1	0.098162	0.924274	0.943509	0.622728	1	1	1	1	1	0.115375	0.0158506	1	0.0492674	0.595568	0.824808	0.945727	0.850745	0.532647	0.982185	0.921036	0.954126	1	1	1	0.761535	1	0.73064	0.16779	1	0.853671	0.614239	0.988039	0.157273	1	0.545326	1	0.774071
chr6	140944044	141227043	asar6-141	chr6	140970000	140980000	0.991007	1	2.61e-06	0.605497	0.999451	0.874637	0.657368	0.83029	0.611839	0.622728	0.593851	1	1	1	1	0.830712	0.813106	0.0666992	0.976608	0.998608	0.729722	0.980716	0.850745	0.841393	1	0.726364	0.754401	0.685349	0.592003	1	0.90807	1	1	0.780858	1	0.917179	0.903101	1	0.100453	1	1	0.632957	0.0812196
chr6	140944044	141227043	asar6-141	chr6	140980000	140990000	0.923509	1	0.60751	0.441767	1	0.508999	0.657368	0.965813	1	0.622728	1	1	1	1	1	0.631138	0.944383	0.912516	1	1	0.655115	0.672552	0.868435	1	0.940521	0.726364	0.775359	0.86918	0.984453	1	1	1	1	0.780858	1	0.826206	0.977199	1	0.907696	0.977553	0.545326	0.632957	0.308901
chr6	140944044	141227043	asar6-141	chr6	140990000	141000000	0.750628	1	0.475018	1	0.88545	0.972317	0.657368	0.704707	1	0.995746	0.593851	1	1	1	1	0.663495	0.798647	0.558415	0.766691	1	0.801332	0.945183	0.850745	1	1	0.972772	1	0.851574	1	1	1	1	1	0.780858	1	0.995681	0.976173	1	0.730729	1	1	0.632957	0.774071
chr6	140944044	141227043	asar6-141	chr6	141000000	141010000	0.923509	1	0.809658	0.880883	1	1	0.657368	0.169235	0.943509	0.878345	0.593851	0.988773	1	1	0.887414	0.631138	0.00569063	0.837858	0.85106	0.595568	0.655115	1	0.850745	1	1	0.963279	0.866418	1	1	1	0.875991	1	0.597154	0.780858	1	0.858114	0.976173	1	0.218011	1	0.26263	1	0.833449
chr6	140944044	141227043	asar6-141	chr6	141010000	141020000	0.750628	0.537225	0.880672	0.605497	1	0.508999	0.657368	0.704707	0.887648	0.622728	1	0.973379	1	1	1	0.645997	0.042201	0.710817	0.654186	1	0.655115	0.804259	0.850745	1	1	0.891997	0.754401	0.685349	1	1	0.761535	0.938756	0.968224	0.780858	0.961083	0.826206	0.614239	1	0.545173	1	0.938341	0.924142	0.774071
chr6	140944044	141227043	asar6-141	chr6	141020000	141030000	0.827245	1	1	0.605497	0.875684	1	0.688334	0.512681	0.780894	0.0143293	0.998611	1	1	1	1	0.631138	1.95e-11	0.558415	0.00422301	0.688739	0.807029	0.834978	0.850745	1	1	0.847473	1	0.687269	1	1	0.681026	1	1	0.780858	1	0.833957	0.614239	1	0.730729	0.751901	0.777419	0.632957	0.781624
chr6	140944044	141227043	asar6-141	chr6	141030000	141040000	0.750628	1	0.850031	0.756109	1	0.508999	0.000348068	0.0991881	0.906663	0.778563	0.593851	0.819102	1	1	1	0.645997	1e-11	0.558415	0.0220157	0.595568	0.655115	1	0.850745	1	1	1	1	1	1	0.560821	0.854533	1	0.922415	0.780858	1	0.826206	0.817157	0.988039	0.624836	1	0.860184	0.632957	0.774071
chr6	140944044	141227043	asar6-141	chr6	141040000	141050000	0.919994	1	0.60751	0.605497	0.788441	0.508999	0.657368	0.772318	1	0.938937	1	1	1	0.985788	1	0.631138	0.453847	0.991248	0.654186	1	0.655115	0.834978	0.850745	1	1	1	0.754401	1	1	1	0.998792	1	1	0.88481	1	1	0.977199	1	0.545173	1	0.545326	0.632957	0.774071
chr6	140944044	141227043	asar6-141	chr6	141050000	141060000	1	1	0.907775	0.605497	1	1	0.00052521	0.372851	1	0.622728	0.593851	0.513504	1	1	1	0.631138	0.547164	1	0.654186	1	0.815359	0.567766	0.850745	1	1	0.726364	0.775359	1	0.994369	0.915346	0.681026	1	0.597154	0.984397	1	0.9983	0.614239	1	0.173845	1	0.98453	0.847297	0.274324
chr6	140944044	141227043	asar6-141	chr6	141060000	141070000	0.750628	1	0.133308	0.960076	0.921937	1	0.998845	0.136045	0.611839	0.622728	1	0.57231	1	1	1	0.645997	0.704814	1	0.899005	1	0.703508	0.834978	0.850745	0.532647	0.634051	0.847473	0.775359	0.903255	1	1	1	1	0.984588	0.780858	0.774409	0.917179	0.614239	1	0.545173	0.751901	1	0.632957	0.102323
chr6	140944044	141227043	asar6-141	chr6	141070000	141080000	0.93452	1	0.60751	0.842888	0.799167	0.83432	0.657368	0.704707	1	0.45186	1	0.982051	1	0.979822	1	0.645997	0.704814	1	0.910544	1	0.983444	0.567766	0.850745	1	1	0.100884	0.210238	0.882698	1	0.999149	0.964883	1	0.64255	0.88481	0.774409	0.934442	0.452625	1	0.545173	1	1	0.632957	0.341325
chr6	140944044	141227043	asar6-141	chr6	141080000	141090000	0.750628	1	0.60751	0.909305	0.95387	0.508999	0.657368	0.722131	0.999377	0.622728	0.830436	0.999951	1	0.607275	1	0.631138	0.704814	1	0.654186	1	1	0.769889	0.850745	1	1	0.726364	0.754401	1	1	1	1	1	0.597154	0.780858	0.774409	1	0.614239	1	0.755131	0.976628	0.545326	0.98539	0.774071
chr6	140944044	141227043	asar6-141	chr6	141090000	141100000	0.750628	1	1	0.605497	0.927321	0.508999	0.556991	0.704707	1	1	0.802287	1	1	1	1	0.631138	0.743728	1	1	1	0.655115	0.93714	0.850745	1	0.946206	0.726364	1	1	1	1	0.761535	1	0.777152	0.780858	1	1	0.787063	1	0.100453	1	0.545326	0.903364	0.392238
chr6	140944044	141227043	asar6-141	chr6	141100000	141110000	0.844799	1	1	1.98e-05	0.919729	0.508999	0.657368	0.420397	0.611839	0.622728	0.751236	1	1	0.944472	1	0.674342	0.704814	0.996871	0.919551	1	0.00444637	0.830625	0.850745	0.918447	1	0.996677	0.936319	1	0.999469	0.97039	0.681026	1	0.899146	0.780858	0.934409	0.968057	0.000155202	1	3.48e-07	0.960862	1	0.632957	0.774071
chr6	140944044	141227043	asar6-141	chr6	141110000	141120000	0.750628	0.684942	0.60751	0.905191	1	0.508999	0.466108	0.0817459	1	0.622728	0.593851	0.982051	0.990153	0.849622	1	0.151788	1.91e-07	1	0.610163	1	0.655115	0.567766	0.30734	1	1	0.726364	0.0984955	0.131711	0.567246	0.560821	0.984451	1	0.736427	0.745843	0.934952	0.853671	0.013237	1	0.778125	0.968073	0.545326	0.0703013	0.668732
chr6	140944044	141227043	asar6-141	chr6	141120000	141130000	0.750628	1	0.60751	0.00829144	0.859397	1	4.77e-08	0.165025	1	0.208372	1	1	0.990153	0.803982	0.946656	0.631138	0.000142341	1	0.0149798	0.595568	0.994532	0.567766	0.850745	1	1	0.152805	0.754401	0.685349	0.592003	0.560821	0.992241	0.786853	0.922415	0.88481	1	0.853671	0.614239	1	0.0242717	1	0.545326	0.759782	0.116946
chr6	140944044	141227043	asar6-141	chr6	141130000	141140000	0.827245	1	0.60751	0.898499	1	0.876166	0.657368	0.704707	1	0.622728	1	1	1	1	0.794526	0.645997	0.704814	0.732987	0.654186	1	0.655115	0.665484	0.850745	1	1	0.963279	0.977265	1	1	1	0.681026	1	1	0.738573	1	0.917179	0.997041	1	0.545173	1	0.966471	0.884057	0.112318
chr6	140944044	141227043	asar6-141	chr6	141140000	141150000	1	1	0.60751	0.605497	1	1	0.0508543	0.669082	0.995781	0.784916	1	1	1	1	1	0.631138	0.0952135	0.990355	0.654186	1	0.870693	1	0.850745	1	1	0.766501	0.902085	1	1	1	1	1	0.922415	0.684021	1	1	0.614239	1	1	1	0.861479	0.980908	0.193884
chr6	140944044	141227043	asar6-141	chr6	141150000	141160000	0.99989	1	0.60751	0.605497	0.771116	0.632455	0.890643	0.704707	1	0.949023	0.977019	1	1	1	0.975206	0.0431685	0.745972	1	1	1	0.875614	0.995275	0.850745	1	1	0.726364	0.300466	0.998718	1	1	1	1	0.793267	0.780858	1	1	2.78e-05	1	0.545173	0.979924	0.83528	0.632957	0.679881
chr6	140944044	141227043	asar6-141	chr6	141160000	141170000	0.750628	1	0.60751	0.605497	0.91388	0.971111	0.657368	0.522408	1	0.622728	0.976938	0.952256	1	1	1	0.0265908	0.704814	0.848938	0.814494	1	0.875614	1	0.850745	1	1	0.73686	0.613132	1	1	0.884025	0.875991	1	0.922415	0.780858	0.74772	1	0.397823	1	0.545173	1	0.640795	0.838673	0.63578
chr6	140944044	141227043	asar6-141	chr6	141180000	141190000	0.750628	1	0.99094	1	0.955258	1	0.96697	0.00251536	1	0.622728	0.593851	1	1	1	1	0.890478	0.704814	1	1	1	0.851345	0.942012	0.850745	1	1	0.726364	0.754401	1	1	0.560821	1	1	1	0.640237	1	1	0.977199	1	1	1	0.545326	0.632957	0.480081
chr6	140944044	141227043	asar6-141	chr6	141190000	141200000	0.923509	1	0.60751	1	0.951521	1	1	0.890101	1	0.683574	0.593851	1	1	1	1	0.977268	0.704814	0.995498	1	1	0.994898	1	0.850745	1	1	0.726364	0.866418	0.859887	1	1	1	1	1	0.894578	1	1	1	1	0.879922	1	0.748967	0.858325	0.774071
chr6	140944044	141227043	asar6-141	chr6	141200000	141210000	0.827245	1	0.646608	1	1	0.731588	0.181461	0.116378	1	0.385234	0.81371	1	1	1	1	0.898529	0.000310894	1	0.418435	1	0.655115	1	0.943512	1	1	0.00686562	0.0179001	0.685349	1	0.560821	1	1	0.970157	0.417695	0.774409	0.966494	0.864881	1	1	1	0.731832	0.714515	0.000108214
chr6	140944044	141227043	asar6-141	chr6	141210000	141220000	0.843511	1	0.60751	0.511147	0.81073	1	0.657368	0.704707	0.611839	0.622728	0.829415	1	1	1	1	0.00940139	0.704814	1	0.810471	1	0.767024	0.986354	0.850745	1	1	0.162264	0.396043	0.789259	1	0.94791	0.992031	1	0.947657	0.780858	0.980223	0.968057	0.101574	1	0.545173	1	0.615489	0.759827	0.160417
chr8	2587853	2792346	asar8-2.7	chr8	2590000	2600000	0.882723	0.498774	0.342839	0.605497	0.954309	1	0.657368	0.704707	0.611839	0.000669191	0.593851	1	0.543974	0.989275	1	0.977268	0.704814	0.558415	0.654186	0.595568	0.655115	0.980575	0.906471	0.532647	1	1.54e-07	0.00265636	0.685349	0.567246	0.560821	0.789684	0.520272	1	0.780858	0.663427	0.853671	0.797921	0.548234	0.545173	1	0.545326	0.667745	4.16e-07
chr8	2587853	2792346	asar8-2.7	chr8	2610000	2620000	0.750628	0.80258	0.60751	0.605497	0.981129	0.990273	0.657368	0.704707	0.611839	0.286642	0.593851	1	0.848766	1	1	0.809695	0.704814	0.558415	0.654186	0.595568	0.984447	0.845777	0.850745	0.532647	1	0.00453001	0.754401	0.685349	0.567246	0.560821	0.772119	0.520272	1	0.760616	0.97928	0.853671	0.976173	0.548234	0.94392	1	0.545326	0.632957	0.000285188
chr8	2587853	2792346	asar8-2.7	chr8	2640000	2650000	0.827245	0.498774	0.916281	0.678686	0.771116	1	0.657368	0.856795	0.943509	3.7e-05	0.780037	0.56322	0.543974	0.982033	1	1	0.87487	0.558415	0.810471	0.706891	0.840857	0.567766	0.869007	0.532647	1	0.117529	0.189982	0.685349	0.567246	0.560821	0.947456	0.520272	0.979745	0.780858	0.663427	0.917179	0.614239	0.548234	0.907696	1	0.545326	0.989784	1.36e-05
chr8	2587853	2792346	asar8-2.7	chr8	2660000	2670000	0.750628	0.498774	0.60751	0.605497	0.859397	0.508999	0.657368	0.704707	0.943509	0.000721626	0.593851	0.830785	0.543974	0.607275	1	4.65e-07	0.704814	0.558415	0.654186	0.691126	0.884591	0.567766	0.850745	0.532647	1	0.0534527	0.754401	0.685349	0.731754	0.560821	0.681026	0.520272	1	0.848217	0.0168502	0.826206	0.614239	0.548234	7.72e-06	0.883174	0.860184	0.948248	0.000178833
chr8	2587853	2792346	asar8-2.7	chr8	2690000	2700000	0.827245	0.498774	0.60751	0.605497	0.921937	0.893562	0.657368	0.704707	0.611839	0.622728	0.593851	1	0.543974	0.607275	1	5.54e-09	0.704814	0.558415	0.654186	0.595568	0.655115	1	0.850745	0.532647	1	0.726364	0.775359	0.689076	0.567246	0.560821	0.839787	0.520272	1	0.780858	0.663427	0.889025	0.410168	0.735949	0.545173	1	0.545326	0.903295	0.293763
chr8	2587853	2792346	asar8-2.7	chr8	2720000	2730000	1	0.498774	0.605509	0.605497	0.94716	0.730088	0.657368	0.704707	0.611839	0.622728	0.593851	1	0.543974	1	1	0.782359	0.759823	0.558415	0.654186	0.595568	0.795729	1	0.850745	0.532647	1	0.726364	0.775359	0.989453	0.731754	0.560821	0.772347	0.520272	0.869623	0.780858	0.774409	0.826206	0.614239	0.548234	0.420945	1	0.545326	0.632957	0.0111998
chr8	2587853	2792346	asar8-2.7	chr8	2740000	2750000	1	0.498774	0.888325	0.605497	0.867733	0.628998	0.657368	0.704707	0.611839	0.761529	0.593851	0.963451	0.848766	1	1	0.00170802	0.759823	0.558415	0.654186	0.595568	0.655115	0.773002	0.946792	0.532647	1	0.726364	0.787572	0.685349	0.567246	0.884025	0.992128	0.520272	0.796564	0.780858	0.774409	0.833957	0.0601423	0.548234	0.545173	1	0.545326	0.691754	0.0129846
chr8	2587853	2792346	asar8-2.7	chr8	2770000	2780000	0.750628	0.498774	0.381907	0.605497	1	0.639293	0.657368	0.856795	0.611839	0.622728	0.593851	0.918718	0.543974	0.968939	1	0.631138	0.704814	0.558415	0.654186	0.595568	0.93858	1	0.850745	0.532647	1	0.800283	0.775359	0.685349	0.731754	0.560821	0.681026	0.520272	0.9357	0.780858	0.663427	0.853671	0.614239	0.548234	0.0693061	1	0.860184	0.632957	0.462436
chr8	2587853	2792346	asar8-2.7	chr8	2580000	2590000	0.827245	0.498774	0.653439	0.605497	0.970207	0.508999	0.657368	0.704707	0.611839	0.359356	0.593851	0.542029	0.543974	0.623656	0.565981	1	0.704814	0.558415	0.654186	0.595568	0.734468	0.959579	0.850745	1	1	0.726364	0.754401	0.685349	0.567246	0.560821	0.681026	0.520272	0.922415	0.964157	0.663427	0.853671	0.993626	0.548234	0.420945	1	0.785534	0.981788	0.0546949
chr8	2587853	2792346	asar8-2.7	chr8	2600000	2610000	0.750628	0.498774	0.60751	0.605497	0.901683	0.508999	0.657368	0.704707	0.611839	6.52e-06	0.593851	0.982051	0.543974	0.607275	1	0.631138	0.704814	0.558415	0.654186	0.706891	0.655115	0.873003	0.967593	0.532647	1	1.23e-09	1.11e-05	0.0212432	0.731754	0.884025	0.761535	0.520272	1	0.976549	0.663427	0.826206	0.977199	0.548234	0.0242717	1	0.545326	0.928102	5.43e-10
chr8	2587853	2792346	asar8-2.7	chr8	2630000	2640000	0.776425	0.498774	0.00766395	0.605497	0.771116	1	0.657368	0.704707	0.611839	0.622728	0.593851	1	0.543974	1	1	0.137374	0.704814	0.558415	0.654186	0.595568	0.94978	0.764629	0.850745	0.532647	1	0.726364	0.754401	0.994795	0.731754	0.560821	0.761535	0.520272	0.990699	0.866762	0.93904	0.833957	0.270263	0.548234	0.545173	1	0.545326	1	0.00557141
chr8	2587853	2792346	asar8-2.7	chr8	2650000	2660000	0.95471	0.498774	0.0454606	0.605497	0.771116	0.508999	0.657368	0.704707	0.943509	0.0506637	0.593851	0.614418	0.543974	0.607275	1	0.0112279	0.704814	0.558415	0.654186	0.595568	0.655115	1	0.850745	0.532647	1	0.113321	0.0984955	0.789259	0.567246	0.560821	0.70937	0.520272	0.0616651	0.962148	0.663427	0.833957	0.614239	0.548234	0.778125	1	0.545326	0.632957	6.37e-06
chr8	2587853	2792346	asar8-2.7	chr8	2670000	2680000	0.96069	0.498774	0.417838	0.605497	1	0.508999	0.657368	0.83029	0.611839	0.0081011	0.533618	1	0.543974	0.822529	1	0.941984	0.704814	0.558415	0.654186	0.595568	0.693474	0.567766	0.869007	0.532647	1	0.377372	0.754401	0.685349	0.567246	0.560821	0.524074	0.520272	1	0.888011	0.559652	0.833957	0.614239	0.548234	8.82e-06	1	0.545326	1	0.000932228
chr8	2587853	2792346	asar8-2.7	chr8	2680000	2690000	1	0.498774	0.523776	0.605497	1	0.508999	0.657368	0.856795	0.611839	0.0913908	0.593851	1	0.543974	0.652779	1	0.859648	0.704814	0.558415	0.654186	0.595568	0.767574	0.567766	0.982305	0.532647	1	0.726364	0.866418	0.736925	0.567246	0.560821	0.827813	0.520272	1	0.930088	0.663427	0.833957	0.752524	0.548234	0.545173	1	0.545326	0.746659	4.79e-05
chr8	2587853	2792346	asar8-2.7	chr8	2700000	2710000	1	0.498774	0.60751	0.605497	0.960023	0.772888	0.779803	0.856795	0.611839	0.622728	0.593851	1	0.543974	1	1	0.631138	0.759823	0.558415	0.654186	0.595568	0.655115	0.980575	0.850745	0.532647	1	0.847473	0.775359	0.870411	0.731754	0.560821	1	0.520272	0.856732	0.780858	0.933557	0.826206	0.0063044	0.548234	0.545173	1	0.545326	0.632957	0.774071
chr8	2587853	2792346	asar8-2.7	chr8	2710000	2720000	0.902684	0.498774	0.889878	0.605497	0.958587	0.508999	0.657368	0.704707	0.611839	0.00581243	0.593851	1	0.848766	1	1	0.631138	0.759823	0.558415	0.654186	0.595568	0.7835	0.742747	0.850745	0.532647	1	0.0678456	0.472846	0.685349	0.731754	0.560821	0.979951	0.669409	0.922415	0.962148	0.663427	0.853671	0.871178	0.735949	0.545173	1	0.545326	0.790582	3.3e-06
chr8	2587853	2792346	asar8-2.7	chr8	2730000	2740000	0.923509	0.498774	0.897758	0.82219	0.771116	0.508999	0.657368	0.704707	0.611839	0.0429523	0.593851	1	0.543974	1	1	0.27233	0.704814	0.558415	0.654186	0.595568	0.655115	1	0.973368	0.532647	1	0.726364	0.754401	0.685349	0.567246	0.560821	0.916884	0.520272	1	0.780858	0.663427	0.853671	0.977199	0.548234	0.545173	1	0.545326	1	5.94e-05
chr8	2587853	2792346	asar8-2.7	chr8	2760000	2770000	0.750628	0.498774	0.60751	0.605497	1	0.508999	0.657368	0.704707	0.943509	0.0259877	0.593851	1	0.543974	1	1	0.908646	0.704814	0.558415	0.654186	0.595568	0.10282	0.567766	0.850745	0.532647	1	0.00264463	0.275006	0.685349	0.567246	0.560821	1	0.520272	1	0.780858	0.905766	0.889025	1	0.548234	0.679893	1	0.545326	0.632957	4.14e-06
chr8	2587853	2792346	asar8-2.7	chr8	2780000	2790000	1	0.498774	0.701076	0.605497	0.771116	1	0.657368	0.704707	0.611839	0.622728	0.593851	0.976617	0.543974	0.754593	1	0.0737366	0.759823	0.558415	0.810471	0.595568	0.995645	0.989672	0.850745	0.532647	1	0.726364	0.754401	0.789259	0.567246	0.560821	0.681026	0.520272	1	0.962148	0.663427	0.968057	0.817157	0.548234	1.54e-16	1	0.545326	0.632957	0.00477782
chr8	2587853	2792346	asar8-2.7	chr8	2620000	2630000	1	0.498774	0.60751	0.605497	0.771116	1	0.657368	0.704707	0.611839	0.161113	0.593851	0.513504	0.543974	0.992567	1	0.631138	0.750418	0.558415	0.654186	0.595568	0.875614	0.968849	0.850745	0.532647	1	0.726364	0.754401	0.685349	0.731754	0.560821	0.761535	0.520272	0.922415	0.780858	0.892983	0.826206	0.153418	0.548234	0.545173	1	0.545326	0.632957	0.052265
chr8	2587853	2792346	asar8-2.7	chr8	2750000	2760000	0.932762	0.498774	1	0.605497	0.962163	0.508999	0.657368	0.704707	0.611839	0.0505429	0.593851	1	0.543974	1	1	0.631138	0.704814	0.558415	0.654186	0.595568	0.655115	1	0.926067	0.532647	1	0.44377	0.754401	0.722327	0.869756	0.560821	0.854716	0.520272	1	0.780858	0.736202	0.826206	0.664067	0.548234	0.4718	1	0.545326	0.973603	6.82e-05
chr9	22236757	23073735	asar9-23	chr9	22250000	22260000	0.750628	1	0.60751	1	0.771116	0.508999	0.657368	0.669082	0.958966	0.622728	0.593851	0.513504	0.54338	0.607275	0.565981	0.631138	0.704814	0.558415	0.654186	0.595568	0.655115	0.567766	0.850745	1	0.472989	0.726364	0.754401	0.685349	0.567246	0.560821	0.681026	0.809452	0.597154	0.780858	0.663427	0.826206	0.614239	0.154537	0.545173	0.641248	0.206209	0.632957	0.774071
chr9	22236757	23073735	asar9-23	chr9	22270000	22280000	0.670671	0.80258	0.60751	0.618031	0.859397	0.508999	1	0.020123	0.611839	0.622728	0.593851	0.513504	0.543974	0.652779	0.565981	0.631138	0.704814	0.576255	0.99055	0.973531	0.655115	0.567766	0.850745	0.790541	0.472989	0.726364	0.754401	0.685349	0.567246	0.560821	0.681026	0.669409	0.597154	0.780858	0.663427	0.853671	0.614239	0.548234	0.545173	0.641248	1	0.632957	0.774071
chr9	22236757	23073735	asar9-23	chr9	22300000	22310000	0.750628	1	0.60751	0.605497	0.771116	0.508999	0.657368	0.00105017	0.874416	0.622728	0.0166884	0.513504	0.0666692	0.607275	0.565981	0.631138	0.57181	1	0.942205	0.89929	0.655115	0.567766	0.850745	0.0874094	0.472989	0.726364	0.754401	0.685349	0.567246	0.560821	0.681026	0.987254	0.597154	0.780858	0.663427	0.889025	0.614239	1	0.545173	0.641248	0.000518288	0.632957	0.774071
chr9	22236757	23073735	asar9-23	chr9	22320000	22330000	0.750628	1	0.60751	0.605497	0.771116	0.508999	1.13e-06	0.177117	0.943509	0.622728	0.533618	0.513504	0.543974	0.607275	0.565981	0.631138	0.649864	1	0.992913	0.997056	0.655115	0.567766	0.850745	0.790541	0.472989	0.726364	0.754401	0.685349	1	0.560821	0.681026	0.728481	0.597154	0.780858	0.663427	0.889025	0.614239	0.548234	0.545173	0.641248	0.98453	0.632957	0.774071
chr9	22236757	23073735	asar9-23	chr9	22350000	22360000	0.750628	0.97457	0.60751	1	0.771116	0.508999	0.64742	0.586262	0.611839	0.622728	0.0286172	0.513504	0.543974	0.607275	0.565981	0.631138	0.704814	0.558415	0.654186	0.595568	0.655115	0.567766	0.850745	0.702006	0.472989	0.726364	0.754401	0.685349	0.567246	0.560821	0.681026	0.826501	0.597154	0.780858	0.663427	0.853671	0.614239	0.979219	0.545173	0.641248	0.545326	0.632957	0.774071
chr9	22236757	23073735	asar9-23	chr9	22370000	22380000	0.827245	0.80258	0.60751	0.82219	0.771116	0.508999	0.64371	0.295942	1	0.622728	0.780037	0.513504	0.543974	0.607275	0.565981	0.631138	0.216894	0.558415	0.0199963	0.302638	0.655115	0.567766	0.850745	1	0.472989	0.726364	0.754401	0.685349	0.869756	0.560821	0.681026	0.520272	0.597154	0.780858	0.663427	0.826206	0.614239	0.548234	0.545173	0.641248	0.545326	0.632957	0.774071
chr9	22236757	23073735	asar9-23	chr9	22400000	22410000	0.750628	0.498774	0.60751	0.988312	0.771116	0.508999	0.773242	0.00724848	0.611839	0.622728	0.976938	0.513504	0.917847	0.607275	0.565981	0.631138	1.9e-05	1	0.000627302	0.641336	0.655115	0.567766	0.850745	0.532647	0.472989	0.847473	0.754401	0.685349	0.567246	0.698281	0.681026	0.520272	0.597154	0.780858	0.663427	0.833957	0.614239	0.548234	0.545173	0.641248	0.545326	0.632957	0.774071
chr9	22236757	23073735	asar9-23	chr9	22430000	22440000	0.750628	0.80258	0.60751	0.477716	0.771116	0.508999	0.0140843	0.704707	0.40895	0.622728	0.0494998	0.513504	0.543974	0.607275	0.565981	0.631138	0.061626	0.558415	0.654186	0.595568	0.655115	0.567766	0.850745	0.532647	0.472989	0.726364	0.775359	0.685349	0.592003	0.560821	0.681026	0.520272	0.29964	0.780858	0.663427	0.265273	0.614239	0.979219	0.545173	0.751901	0.545326	0.632957	0.913604
chr9	22236757	23073735	asar9-23	chr9	22480000	22490000	0.750628	0.97457	0.60751	0.863868	0.771116	0.508999	0.721457	0.704707	0.745333	0.622728	0.593851	0.513504	0.543974	0.607275	0.565981	0.631138	0.704814	0.558415	0.654186	0.595568	0.655115	0.567766	0.850745	0.702006	0.472989	0.726364	0.754401	0.685349	0.234931	0.972681	0.681026	0.771133	0.597154	0.780858	0.663427	0.826206	0.614239	0.548234	0.545173	0.641248	0.98453	0.632957	0.774071
chr9	22236757	23073735	asar9-23	chr9	22530000	22540000	0.752717	0.608096	0.60751	0.605497	0.771116	0.508999	0.424663	0.571285	0.943509	0.622728	0.593851	0.513504	0.543974	0.607275	0.565981	0.631138	0.136121	0.837858	0.654186	0.858007	0.655115	0.567766	0.850745	0.532647	0.472989	0.726364	0.754401	0.685349	0.567246	0.560821	0.681026	0.654632	0.597154	0.780858	0.663427	0.853671	0.614239	0.894277	0.907696	0.641248	0.860184	0.632957	0.833449
chr9	22236757	23073735	asar9-23	chr9	22580000	22590000	0.750628	0.80258	0.60751	0.63743	0.771116	0.508999	0.657368	0.704707	0.83289	0.622728	0.593851	0.513504	0.543974	0.607275	0.565981	0.631138	0.704814	0.837858	0.654186	0.754975	0.655115	0.567766	0.850745	1	0.472989	0.726364	0.754401	0.685349	0.567246	0.560821	0.681026	0.612651	0.597154	0.88481	0.663427	0.968057	0.614239	0.735949	0.545173	0.641248	0.545326	0.632957	0.774071
chr9	22236757	23073735	asar9-23	chr9	22630000	22640000	0.750628	0.80258	0.60751	0.605497	0.771116	0.508999	0.657368	0.704707	0.887648	0.622728	0.593851	0.513504	0.848766	0.652779	0.565981	0.631138	0.586752	0.837858	0.654186	0.595568	0.655115	0.567766	0.906471	0.532647	0.472989	0.726364	0.754401	0.685349	0.567246	0.560821	0.681026	0.520272	0.597154	0.780858	0.774409	0.853671	0.614239	0.548234	0.545173	0.641248	0.545326	0.632957	0.774071
chr9	22236757	23073735	asar9-23	chr9	22730000	22740000	0.827245	0.498774	0.60751	0.605497	0.771116	0.508999	0.657368	0.704707	0.839469	0.622728	0.0494998	0.513504	0.543974	0.607275	0.565981	0.631138	0.704814	0.558415	0.654186	0.782712	0.655115	0.834978	0.850745	1	0.472989	0.726364	0.754401	0.685349	0.567246	0.948896	0.681026	0.520272	0.597154	0.780858	0.663427	0.833957	0.614239	0.548234	0.82028	0.641248	0.860184	0.632957	0.774071
chr9	22236757	23073735	asar9-23	chr9	22760000	22770000	0.827245	0.97457	0.60751	0.605497	0.771116	0.508999	0.657368	0.420397	0.611839	0.622728	0.593851	0.513504	0.543974	0.607275	0.565981	0.631138	0.704814	0.558415	0.996058	0.595568	0.655115	0.567766	0.850745	0.532647	0.472989	0.726364	0.754401	0.685349	0.567246	0.560821	0.681026	0.520272	0.597154	0.780858	0.663427	0.826206	0.614239	0.894277	0.907696	0.641248	0.545326	0.632957	0.774071
chr9	22236757	23073735	asar9-23	chr9	22780000	22790000	0.750628	0.498774	0.60751	0.605497	0.771116	0.870501	0.890207	0.965813	0.611839	0.622728	0.593851	0.513504	0.543974	0.607275	0.565981	0.631138	0.704814	0.837858	0.654186	0.595568	0.655115	0.567766	0.850745	0.532647	0.472989	0.726364	0.754401	0.685349	0.567246	0.560821	0.681026	0.520272	0.597154	0.780858	0.663427	0.833957	0.614239	0.735949	0.545173	0.641248	0.545326	0.632957	0.774071
chr9	22236757	23073735	asar9-23	chr9	22230000	22240000	0.750628	0.608096	0.60751	0.996523	0.771116	0.508999	0.657368	0.856795	0.98218	0.622728	0.593851	0.513504	0.239977	0.607275	0.565981	0.631138	0.153379	1	0.654186	0.595568	0.655115	0.567766	0.869007	1	0.472989	0.726364	0.754401	0.685349	0.567246	1	0.681026	0.520272	0.597154	0.780858	0.663427	0.853671	0.614239	0.548234	0.545173	0.641248	0.206209	0.632957	0.774071
chr9	22236757	23073735	asar9-23	chr9	22240000	22250000	0.750628	1	0.60751	0.605497	0.789617	0.508999	2.9e-07	0.512681	1	0.622728	1	0.513504	0.795243	0.607275	0.565981	0.631138	0.704814	0.837858	0.965019	0.691126	0.655115	0.834978	0.850745	0.926383	0.472989	0.847473	0.754401	0.685349	0.567246	1	0.681026	0.728481	0.597154	0.780858	0.774409	0.945066	0.614239	1	0.545173	0.641248	0.545326	0.632957	0.774071
chr9	22236757	23073735	asar9-23	chr9	22260000	22270000	0.750628	1	0.60751	0.605497	0.771116	0.508999	0.657368	0.00443873	1	0.622728	0.593851	0.513504	0.543974	0.607275	0.565981	0.631138	0.704814	0.558415	0.654186	0.595568	0.655115	0.567766	0.975414	0.702006	0.472989	0.726364	0.754401	0.685349	0.567246	0.789895	0.681026	0.520272	0.597154	0.780858	0.663427	0.945066	0.614239	0.979219	0.545173	0.641248	0.545326	0.632957	0.774071
chr9	22236757	23073735	asar9-23	chr9	22290000	22300000	0.750628	0.97457	0.60751	0.605497	0.771116	0.508999	0.657368	0.704707	1	0.622728	0.00041312	0.513504	0.543974	0.607275	0.565981	0.631138	0.704814	0.558415	0.654186	1	0.655115	0.567766	0.850745	0.532647	0.472989	0.726364	0.754401	0.685349	0.567246	0.560821	0.681026	0.520272	0.597154	0.780858	0.663427	0.833957	0.614239	0.548234	0.545173	0.641248	0.206209	0.632957	0.774071
chr9	22236757	23073735	asar9-23	chr9	22310000	22320000	0.750628	1	0.60751	0.605497	0.771116	0.508999	0.0441765	0.0151209	1	0.622728	0.593851	0.513504	0.543974	0.607275	0.565981	0.631138	0.704814	0.997347	0.654186	0.853495	0.655115	0.567766	0.850745	0.0874094	0.472989	0.726364	0.754401	0.685349	0.869756	0.82114	0.681026	0.689033	0.597154	0.780858	0.774409	0.889025	0.614239	0.806297	0.545173	0.641248	0.777419	0.632957	0.774071
chr9	22236757	23073735	asar9-23	chr9	22330000	22340000	0.750628	1	0.60751	0.997245	0.771116	0.508999	0.657368	0.00140501	0.960156	0.622728	0.000401272	0.513504	0.543974	0.607275	0.565981	0.631138	0.704814	1	0.654186	0.748033	0.655115	0.567766	0.869007	0.532647	0.472989	0.726364	0.754401	0.685349	0.74943	0.884025	0.681026	0.728481	0.597154	0.780858	0.663427	0.968057	0.614239	0.548234	0.545173	0.641248	0.545326	0.632957	0.774071
chr9	22236757	23073735	asar9-23	chr9	22340000	22350000	0.827245	1	0.60751	0.905704	0.771116	0.508999	1	0.147679	1	0.622728	0.593851	0.513504	0.543974	0.607275	0.565981	0.631138	0.576776	1	0.654186	0.987592	0.655115	0.567766	0.850745	0.532647	0.472989	0.726364	0.754401	0.685349	0.95842	0.881807	0.681026	1	0.597154	0.780858	0.663427	0.889025	0.614239	0.735949	0.545173	0.641248	0.860184	0.632957	0.774071
chr9	22236757	23073735	asar9-23	chr9	22360000	22370000	0.750628	1	0.60751	0.605497	0.771116	0.508999	0.657368	0.101712	0.679006	0.622728	0.0166884	0.513504	0.543974	0.607275	0.565981	0.631138	0.00717432	1	0.654186	0.296925	0.655115	0.567766	0.850745	1	0.472989	0.726364	0.754401	0.685349	0.567246	0.560821	0.681026	0.520272	0.597154	0.780858	0.663427	0.833957	0.614239	0.548234	0.545173	0.641248	0.98453	0.632957	0.774071
chr9	22236757	23073735	asar9-23	chr9	22380000	22390000	0.750628	0.92772	0.60751	0.879294	0.771116	0.508999	0.871811	0.704707	1	0.622728	0.533618	0.513504	0.543974	0.607275	0.565981	0.631138	0.01588	0.997347	0.654186	0.707504	0.655115	0.567766	0.869007	0.702006	0.472989	0.726364	0.754401	0.685349	0.567246	0.560821	0.681026	0.838183	0.597154	0.780858	0.663427	0.982434	0.614239	0.660974	0.545173	0.641248	0.860184	0.632957	0.774071
chr9	22236757	23073735	asar9-23	chr9	22390000	22400000	0.750628	0.92772	0.60751	1	0.771116	0.508999	0.0927102	0.241365	0.611839	0.622728	0.593851	0.513504	0.543974	0.607275	0.565981	0.631138	0.704814	1	0.706228	0.706891	0.655115	0.567766	0.850745	0.926383	0.472989	0.726364	0.754401	0.685349	0.567246	0.884025	0.681026	0.838183	0.597154	0.780858	0.663427	0.853671	0.614239	0.806297	0.545173	0.641248	0.206209	0.632957	0.774071
chr9	22236757	23073735	asar9-23	chr9	22420000	22430000	0.750628	0.498774	0.60751	0.965232	0.771116	0.508999	0.657368	0.00322717	1	0.622728	0.217642	0.513504	0.543974	0.607275	0.565981	0.631138	0.416314	0.558415	0.965019	0.96159	0.655115	0.567766	0.850745	0.532647	0.472989	0.726364	0.754401	0.685349	0.567246	0.560821	0.681026	0.902001	0.597154	0.780858	0.663427	0.833957	0.614239	1	0.545173	0.641248	0.860184	0.632957	0.774071
chr9	22236757	23073735	asar9-23	chr9	22460000	22470000	0.750628	1	0.60751	0.82219	0.771116	0.508999	0.657368	0.704707	0.995781	0.622728	0.910982	0.513504	0.831921	0.607275	0.565981	0.631138	0.704814	0.588257	0.893621	0.730651	0.655115	0.567766	0.850745	1	0.472989	0.726364	0.754401	0.685349	0.567246	0.560821	0.681026	0.520272	0.597154	0.780858	0.774409	0.889025	0.614239	0.735949	0.545173	0.641248	0.545326	0.632957	0.774071
chr9	22236757	23073735	asar9-23	chr9	22470000	22480000	0.750628	1	0.60751	0.605497	0.859397	0.508999	0.657368	0.704707	0.611839	0.622728	0.533618	0.513504	0.543974	0.607275	0.565981	0.631138	0.704814	1	0.654186	0.706891	0.655115	0.567766	0.850745	0.532647	0.472989	0.726364	0.754401	0.685349	0.567246	0.560821	0.681026	0.811157	0.597154	0.780858	0.663427	0.889025	0.614239	0.894277	0.545173	0.641248	0.860184	0.632957	0.774071
chr9	22236757	23073735	asar9-23	chr9	22490000	22500000	0.750628	0.73893	0.60751	0.990051	0.789617	0.508999	0.763247	0.704707	0.995781	0.622728	0.593851	0.513504	0.990153	0.607275	0.565981	0.631138	0.759823	0.985824	0.937259	0.595568	0.655115	0.567766	0.850745	1	0.472989	0.726364	0.754401	0.685349	0.869756	0.560821	0.681026	0.520272	0.597154	0.780858	0.663427	0.826206	0.614239	0.548234	0.545173	0.641248	0.545326	0.632957	0.774071
chr9	22236757	23073735	asar9-23	chr9	22510000	22520000	0.827245	1	0.60751	0.778096	0.789617	0.508999	0.371749	0.00524144	1	0.622728	0.593851	0.513504	1	0.652779	0.565981	0.631138	0.704814	0.558415	0.810471	0.706891	0.655115	0.567766	0.906471	0.532647	0.472989	0.726364	0.754401	0.685349	0.567246	0.560821	0.681026	0.728481	0.597154	0.780858	0.663427	0.826206	0.614239	0.735949	0.545173	0.641248	0.860184	0.632957	0.774071
chr9	22236757	23073735	asar9-23	chr9	22520000	22530000	0.750628	1	0.60751	1	0.771116	0.508999	0.254039	0.368233	0.997597	0.622728	0.910982	0.513504	0.543974	0.607275	0.565981	0.631138	0.704814	0.558415	1	0.595568	0.655115	0.567766	0.850745	1	0.472989	0.726364	0.754401	0.685349	0.669477	1	0.681026	0.559041	0.597154	0.780858	0.663427	0.982434	0.614239	0.548234	0.545173	0.641248	0.860184	0.632957	0.774071
chr9	22236757	23073735	asar9-23	chr9	22560000	22570000	0.750628	0.80258	0.60751	0.917407	0.771116	0.508999	0.763247	0.420397	0.943509	0.622728	0.0494998	0.513504	0.543974	0.607275	0.565981	0.631138	0.704814	0.837858	0.810471	0.647169	0.803812	0.567766	0.850745	0.532647	0.472989	0.726364	0.754401	0.685349	0.731754	0.914688	0.681026	0.612651	0.597154	0.780858	0.663427	0.826206	0.614239	0.548234	0.82028	0.641248	0.545326	0.632957	0.774071
chr9	22236757	23073735	asar9-23	chr9	22570000	22580000	0.750628	0.80258	0.60751	0.605497	0.771116	0.508999	0.657368	0.83029	0.887648	0.622728	0.533618	0.513504	0.543974	0.607275	0.565981	0.631138	0.0667134	0.985824	0.654186	0.595568	0.655115	1	0.850745	0.532647	0.472989	0.726364	0.775359	0.685349	0.567246	0.560821	0.681026	0.793103	0.597154	0.780858	0.663427	0.826206	0.614239	0.735949	0.545173	0.751901	0.545326	0.632957	0.774071
chr9	22236757	23073735	asar9-23	chr9	22600000	22610000	0.750628	0.608096	0.60751	0.87248	0.789617	0.508999	0.657368	0.020123	0.943509	0.622728	0.780037	0.513504	0.543974	0.607275	0.565981	0.631138	0.704814	1	1	0.836854	0.655115	0.834978	0.850745	0.532647	0.472989	0.847473	0.754401	0.685349	0.567246	0.560821	0.681026	0.880969	0.597154	0.780858	0.663427	0.833957	0.977199	0.548234	0.545173	0.641248	0.860184	0.632957	0.774071
chr9	22236757	23073735	asar9-23	chr9	22750000	22760000	0.750628	0.97457	0.60751	1	0.771116	0.508999	0.657368	0.00140387	1	0.622728	0.780037	0.513504	0.543974	0.607275	0.565981	0.631138	0.704814	0.837858	0.654186	0.732014	0.655115	0.567766	0.850745	0.532647	0.472989	0.726364	0.754401	0.685349	0.567246	1	0.681026	0.520272	0.597154	0.780858	0.663427	0.833957	0.614239	0.548234	0.545173	0.641248	0.545326	0.632957	0.774071
chr9	22236757	23073735	asar9-23	chr9	22770000	22780000	0.750628	1	0.60751	0.989664	0.499266	0.508999	0.779803	0.0868633	0.987075	0.622728	0.593851	0.513504	7.51e-09	0.607275	0.565981	0.631138	0.7263	0.985824	0.654186	0.782712	0.655115	0.567766	0.869007	0.532647	0.472989	0.726364	0.754401	0.685349	0.592003	0.560821	0.681026	0.654632	0.597154	0.780858	0.663427	0.833957	0.614239	0.548234	0.545173	0.641248	4.82e-08	0.632957	0.774071
chr9	22236757	23073735	asar9-23	chr9	22280000	22290000	0.827245	0.80258	0.60751	0.82219	0.771116	0.508999	0.74058	0.0192681	1	0.622728	0.976938	0.513504	0.960174	0.652779	0.565981	0.631138	0.704814	0.993342	0.654186	0.914316	0.655115	0.567766	0.975414	1	0.472989	0.726364	0.754401	0.685349	0.646979	0.560821	0.681026	0.520272	0.597154	0.780858	0.663427	0.917179	0.614239	0.894277	0.545173	0.751901	1	0.632957	0.774071
chr9	22236757	23073735	asar9-23	chr9	22410000	22420000	0.827245	1	0.60751	0.766734	0.771116	0.508999	0.657368	0.00322717	1	0.622728	0.593851	0.513504	0.915197	0.607275	0.565981	0.631138	5.19e-05	0.985824	0.472483	0.595568	0.655115	0.834978	0.850745	1	0.472989	0.847473	0.754401	0.685349	0.567246	0.560821	0.681026	0.520272	0.597154	0.88481	0.663427	0.945066	0.614239	0.548234	0.907696	0.641248	0.860184	0.632957	0.774071
chr9	22236757	23073735	asar9-23	chr9	22540000	22550000	0.750628	1	0.60751	0.605497	0.789617	0.508999	0.657368	0.0262718	1	0.622728	0.217642	0.513504	0.543974	0.607275	0.565981	0.631138	0.750418	0.588257	0.654186	1	0.655115	0.567766	0.850745	0.466118	0.472989	0.847473	0.754401	0.685349	0.567246	0.914688	0.681026	0.654632	0.597154	0.780858	0.663427	0.853671	0.614239	0.548234	0.545173	0.641248	0.860184	0.632957	0.774071
chr9	22236757	23073735	asar9-23	chr9	22670000	22680000	0.750628	0.498774	0.60751	0.605497	0.771116	0.508999	0.657368	0.704707	1	0.622728	0.593851	0.513504	0.543974	0.607275	0.565981	0.631138	0.759823	0.837858	0.654186	0.595568	0.655115	0.567766	0.850745	0.532647	0.472989	0.847473	0.754401	0.685349	0.567246	0.560821	0.681026	0.520272	0.597154	0.780858	0.663427	0.833957	0.614239	0.548234	0.545173	0.641248	0.860184	0.632957	0.774071
chr9	23487675	23673017	asar9-24	chr9	23490000	23500000	0.750628	0.498774	0.60751	0.605497	0.499266	0.508999	0.657368	0.704707	0.611839	0.622728	0.593851	0.513504	0.543974	0.607275	0.565981	0.631138	0.759823	0.558415	0.654186	0.595568	0.655115	0.567766	1	0.532647	0.472989	0.726364	0.754401	0.685349	0.567246	0.560821	0.681026	0.520272	0.597154	0.780858	0.663427	0.853671	0.614239	0.548234	0.545173	0.641248	0.545326	0.632957	0.774071
[truncated: 180 more columns]
